# Supplementary material
Source: publisher figshare collection journal article supplement (https://springernature.figshare.com/ndownloader/files/23801432)
Supplement: Supplementary file 1 [file 23801432]

## Sheet: _Template
	Data file name(s)	Data file format(s) and file type	Location of data file(s) or repository name	If the dataset is in a repository, enter the accession number, DOI or link to the dataset	How the data file will be accessible by other researchers after your manuscript has been published	If applicable, please explain why the dataset will not be publicly available after publication of the article
Datasets supporting your figures
Figure 1a	CIMBA 1000 Genomes-imputed genotype data	dosage	CIMBA database		Investigators can request data from the CIMBA Data Access Co-Ordination Committee.	The data is protected in accordance with the informed consent received from the study participants and therefore cannot be made publicly available.
Figure 1b	CIMBA 1000 Genomes-imputed genotype data
Figure 1c	CIMBA 1000 Genomes-imputed genotype data
Figure 2	Topologically associated domains in HMEC	Online database/tool	3D genome browser	http://promoter.bx.psu.edu/hi-c/view.php	The data can be accessed via 3D genome browser (Hi-C)
Figure 3	Functional annotations in literature	Published articles	PubMed	https://pubmed.ncbi.nlm.nih.gov/	The references to the cited articles are all listed per target gene in the Supplementary table 8.
(add rows as necessary)
Datasets supporting your tables
Table 1	CIMBA patient phenotype data	text	CIMBA database		Investigators can request data from the CIMBA Data Access Co-Ordination Committee.	The data is protected in accordance with the informed consent received from the study participants and therefore cannot be made publicly available.
Table 2	CIMBA 1000 Genomes-imputed genotype data
Table 3	CIMBA 1000 Genomes-imputed genotype data
Table 4	CIMBA 1000 Genomes-imputed genotype data
Table 5	GeneCards database	Online database/tool	GeneCards	https://www.genecards.org/	The data is open
Table 5	RegulomeDB	Online database/tool	RegulomeDB v 1.1	http://legacy.regulomedb.org/	The data is open
Table 5	GTEx database	Online database/tool	GTEx	https://gtexportal.org/	The data is open
Table 5	Westra et al. eQTL	Online database/tool	Blood eQTL browser	https://genenetwork.nl/bloodeqtlbrowser/	The data is open
(add rows as necessary)
Datasets included in your supplementary information files
Supplementary Table 1	CIMBA patient phenotype data
Supplementary Table 2	CIMBA 1000 Genomes-imputed genotype data
Supplementary Table 3	CIMBA 1000 Genomes-imputed genotype data
Supplementary Table 4	CIMBA 1000 Genomes-imputed genotype data
Supplementary Table 5	CIMBA 1000 Genomes-imputed genotype data
Supplementary Table 6	Functional annotations in literature
Supplementary Table 7	BCAC survival summary results	txt	http://bcac.ccge.medschl.cam.ac.uk/bcacdata/oncoarray/oncoarray-and-combined-summary-result/gwas-summary-results-survival-2019/	DOI: 10.1038/s41416-019-0393-x	The summary results are publicly available
Supplementary Figure 1	CIMBA 1000 Genomes-imputed genotype data
Supplementary Figure 2	CIMBA 1000 Genomes-imputed genotype data
Supplementary Figure 3	CIMBA 1000 Genomes-imputed genotype data
Supplementary Figure 4	CIMBA 1000 Genomes-imputed genotype data
Supplementary Figure 5	CIMBA 1000 Genomes-imputed genotype data
Supplementary Data 1	GeneCards database
Supplementary Data 1	RegulomeDB
Supplementary Data 2	GTEx database
Supplementary Data 2	Westra et al. eQTL
(add rows as necessary)
Other datasets generated as part of this study
Data in CIMBA website	CIMBA survival analysis summary results	txt	http://cimba.ccge.medschl.cam.ac.uk/projects/		The summary results will be publicly available
(add rows as necessary)

## Sheet: EXAMPLE
	Please provide suitable file names that reflect the description of the respective figure/table.	This column refers to the file format of datasets (raw data) that were used to generate the respective figure/table.				npj Breast Cancer strongly encourages data sharing. If your dataset will not be made publicly available, please explain why	You will also be given the opportunity to submit data files to the journal repository: https://springernature.figshare.com/npjbcancer. Please state here which data files you would like to submit.
README: Complete one row for each dataset supporting the figures, tables and results reported in your manuscript	Data file name(s)	Data file format(s) and file type	Location of data file(s) or repository name	If the dataset is in a repository, enter the accession number, DOI or link to the dataset	How the data file will be accessible by other researchers after your manuscript has been published	If applicable, please explain why the dataset will not be publicly available after publication of the article	Would you like to publish these files to the Springer Nature figshare repository? Yes/No
Datasets supporting your figures
Data supporting figure 1	Cell counts_.xlsx	Excel	Supplementary files		Available from npj Breast Cancer figshare repository	Publicly available	Yes
Data supporting figure 2	Histology images.jpg	jpg	Supplementary files		Available from npj Breast Cancer figshare repository	Publicly available	Yes
Data supporting figure 3	recurrent somatic mutations_AML_samples.bam	Bam format	European Genome-phenome archive (EGA)	EGDA00001000107	Publicly shared at the EGA repository	Publicly available	No
Data supporting figure 4	AST, ALT, Total bilirubin.xlsx	Excel	Supplementary files		Available from npj Breast Cancer figshare repository	Publicly available	Yes
Datasets supporting your tables
Data supporting table 1	whole-exome-MSK-IMPACT data_.txt	Txt format	cBioPortal	https://identifiers.org/cbioportal:brca_msk_X_2019	Publicly shared at cBioPortal	Publicly available	No
(add rows as necessary)
Datasets included in your supplementary information files
Data supporting supplementary figure 1	Patient survival data.xlsx	Excel	Institutional file storage		Contact Dr. Smith with data requests	Dataset is not publicly available in order to protect patient privacy	No
Raw RPPA data	Supplementary Table S2.xlsx	Excel	Supplementary information files		Available from npj Breast Cancer figshare repository	Publicly available	Yes
(add rows as necessary)
Other datasets generated as part of this study
Various diagnostics	Patient_therapy_responses_032017.dta	Stata	Institutional file storage		Data are only available to authorized researchers who have submitted an IRB application. Please apply to the X IRB committee, email address:<______> for access to this dataset	Dataset is not publicly available in order to protect patient privacy	No
Transcriptional analysis data	Astrocytes transcriptional analysis.txt	Txt	NCBI GEO	GSE00564	Publicly shared at the GEO repository	Publicly available	No
(add rows as necessary)
